# Supplementary figures and images for: A Novel Assay to Measure the Magnitude of the Inducible Viral Reservoir in HIV-infected Individuals
Source: PubMed Central journal article supplement — eBioMedicine. 2015 Jun 27;2(8):874–83. doi: 10.1016/j.ebiom.2015.06.019 (PMC4563128; doi:10.1016/j.ebiom.2015.06.019), 2015-06-27

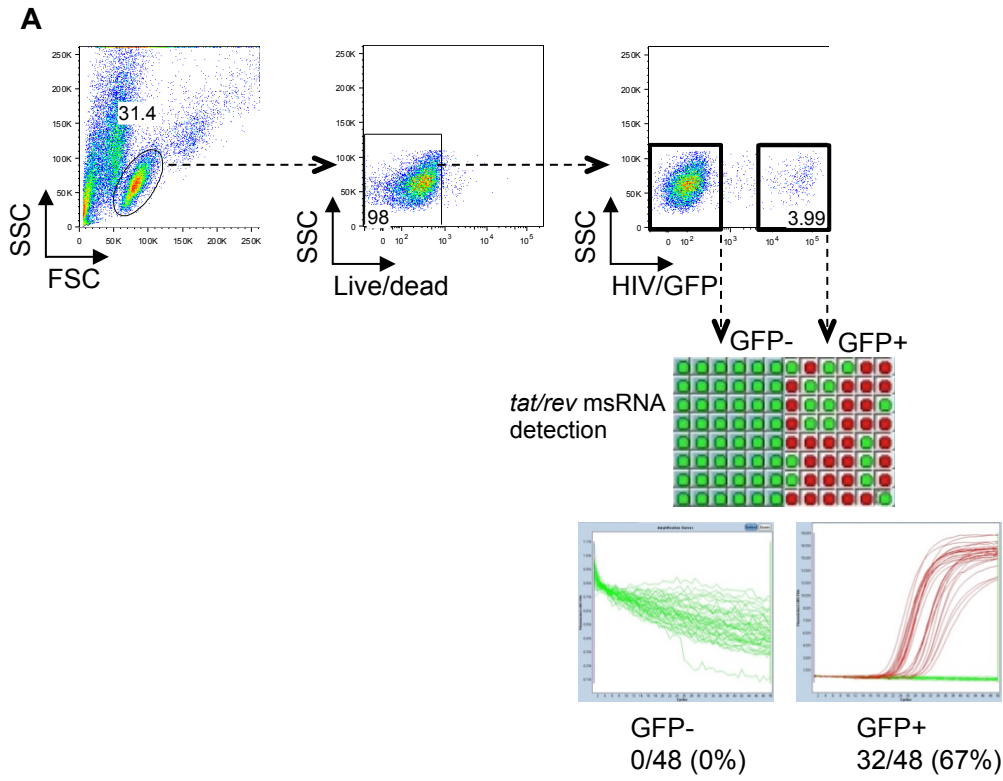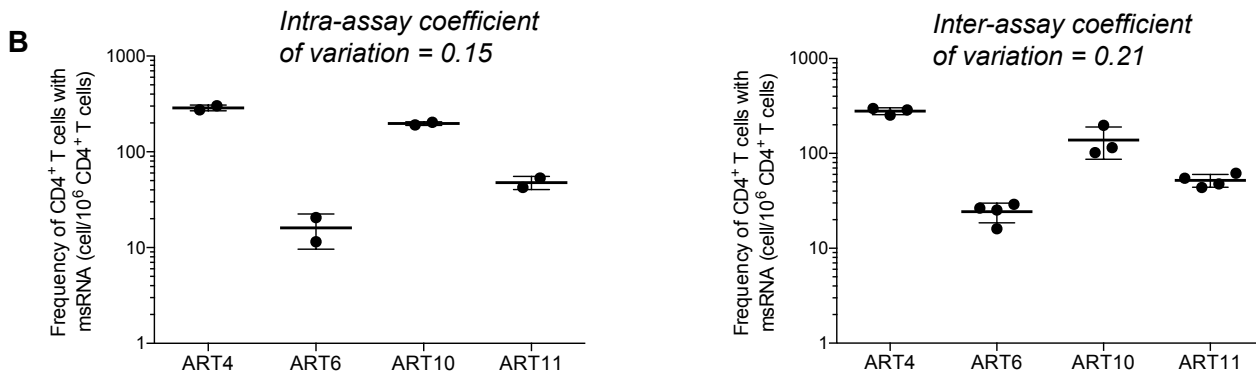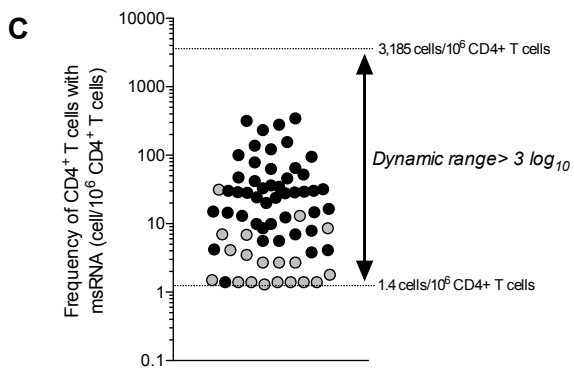

Supplement: mmc1.pdf [file mmc1.pdf]
